# Supplementary material for: Microorganism-mediated synthesis of chemically difficult-to-synthesize Au nanohorns with excellent optical properties in the presence of hexadecyltrimethylammonium chloride
Source: Royal Society of Chemistry journal article supplement (doi:10.1039/c3nr02290k), 2013-01-01
Supplement: c3nr02290k.pdf [file c3nr02290k.pdf]

# Microorganism-mediated synthesis of chemically difficult-to-synthesize Au nanohorns with excellent optical properties in the presence of hexadecyltrimethylammonium chloride

Miao Wang,<sup>a</sup> Tareque Odoom-Wubah,<sup>a</sup> Huimei Chen,<sup>b</sup> Xiaolian Jing,<sup>b</sup> Tao Kong,<sup>a</sup> Daohua Sun,<sup>a</sup> Jiale Huang,\*<sup>a</sup> Qingbiao Li<sup>a,b</sup>

<sup>a</sup> Department of Chemical and Biochemical Engineering, College of Chemistry and Chemical Engineering and National Laboratory for Green Chemical Productions of Alcohols, Ethers and Esters, and Key Lab for Chemical Biology of Fujian Province, Xiamen University, Xiamen, 361005, P. R. China. Corresponding author. E-mail: cola@xmu.edu.cn. Phone: (+86) 592-2183088. Fax: (+86)592- 2184822

<sup>b</sup> Environmental Science Research Center, College of Oceanography and Environmental Science, Xiamen University, Xiamen, 361005, P. R. China.

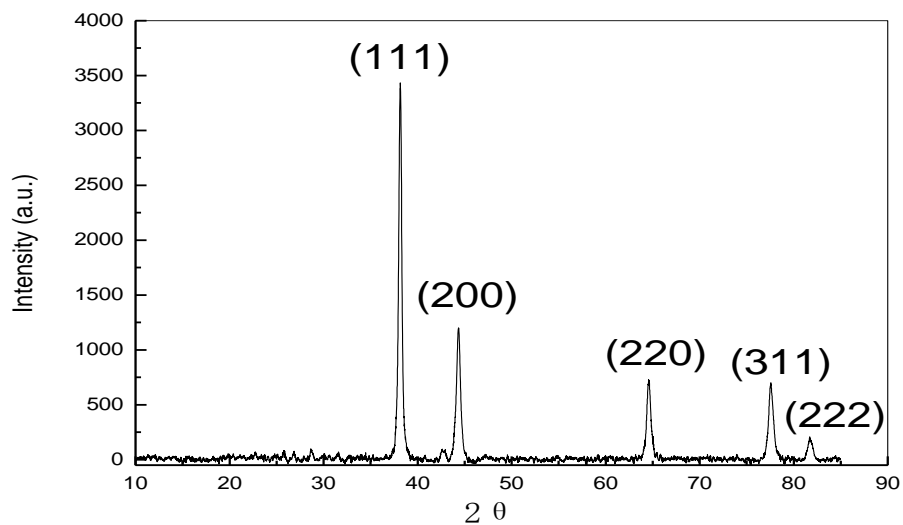

**Figure S1.** XRD pattern of AuNHs synthesized through the reduction of aqueous HAuCl<sub>4</sub> (0.25 mM) with AA (0.5 mM) in the presence of the dried PPCs (0.005 g) and CTAC concentration of 5.0 mM.

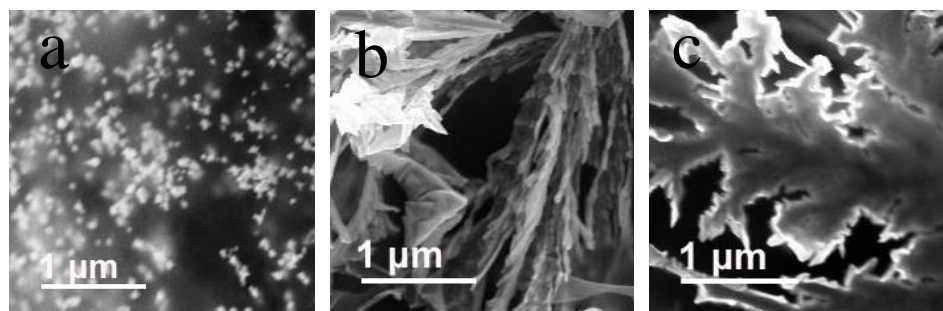

**Figure S2.** SEM images of Au nanostructures synthesized through the reduction of aqueous  $\text{HAuCl}_4$  (0.25 mM) with AA (0.5 mM) at 30 °C in the presence of the dried PPCs (0.005 g) using different CTAC concentrations: (a) 0.002, (b) 0.01, and (c) 0.05 M.

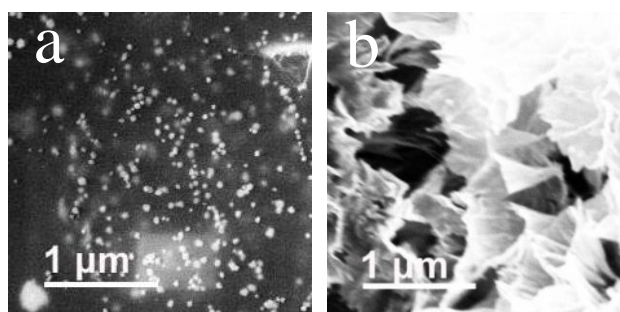

**Figure S3.** SEM images of Au nanostructures synthesized through the reduction of aqueous  $\text{HAuCl}_4$  (0.25 mM) at different concentration of AA: (a) 0.25 and (b) 1.0 mM in the presence of the dried PPCs (0.005 g) and CTAC (5.0 mM) at 30 °C.

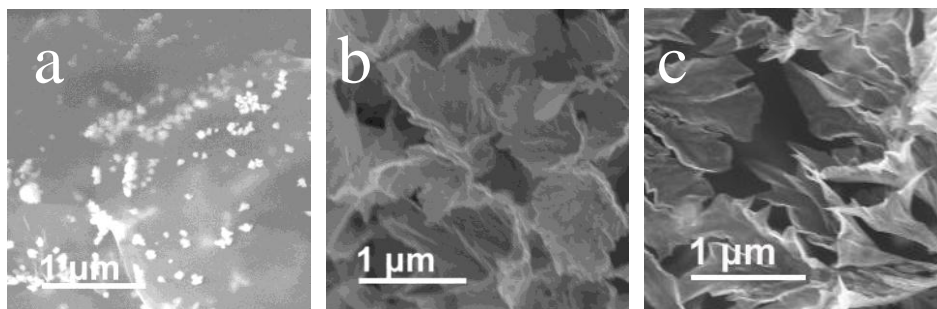

**Figure S4.** SEM images of Au nanostructures synthesized through the reduction of aqueous  $\text{HAuCl}_4$  at (a) 0.5, (b) 0.125, and (c) 0.05mM with AA (0.5 mM) and CTAC (5.0 mM) in the presence of dried PPCs (0.005g) at 30 °C.

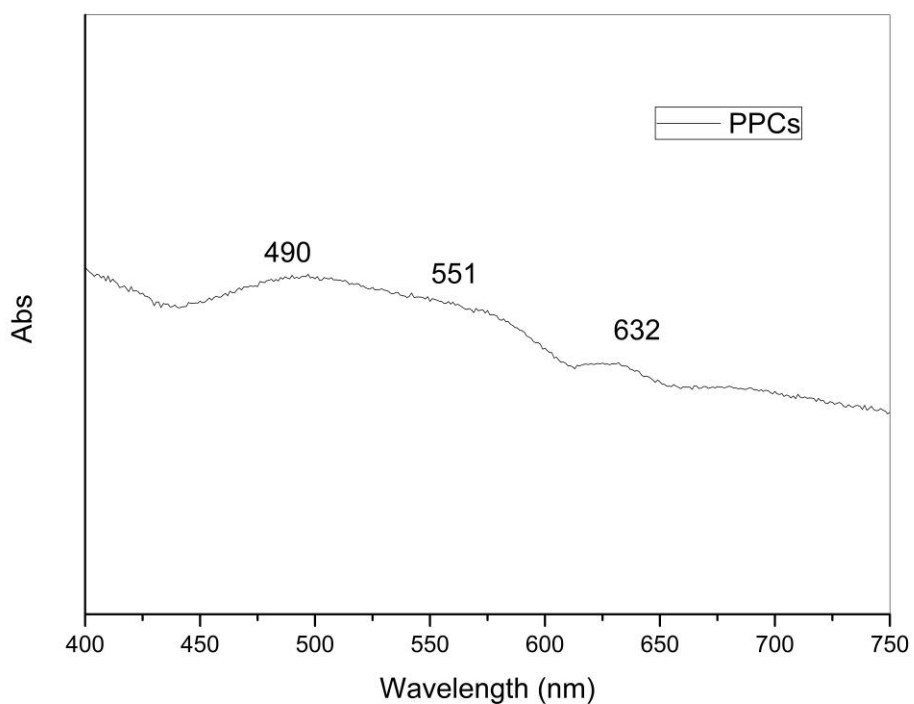

**Figure S5.** UV-vis absorption spectrum of the PPCs.

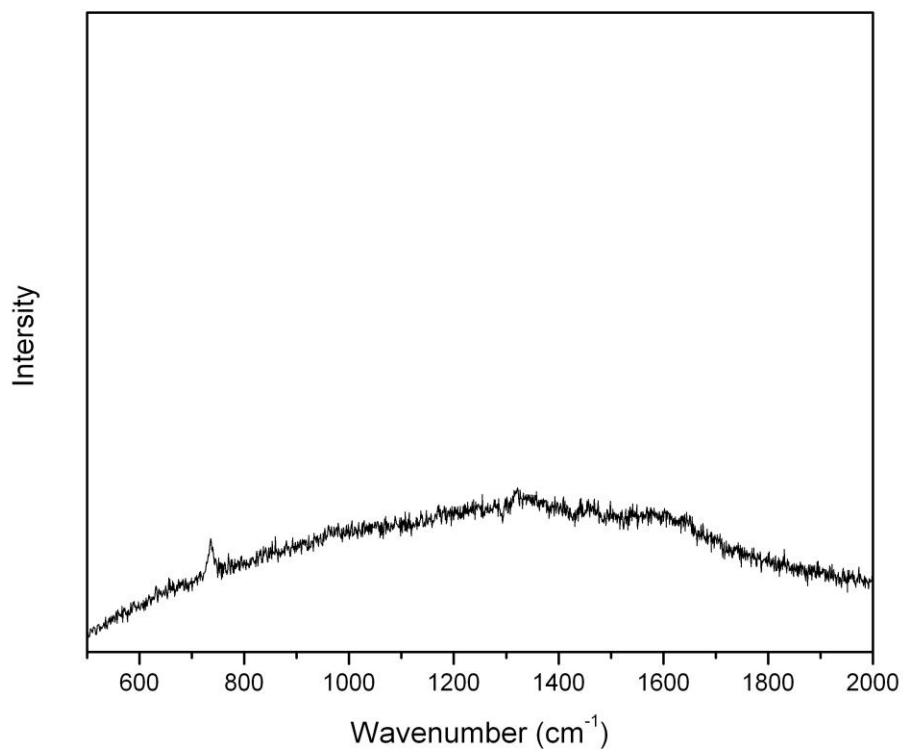

**Figure S6.** Raman spectrum of pure PPCs in the presence of  $10^{-9}$  M Rhodamine 6G..

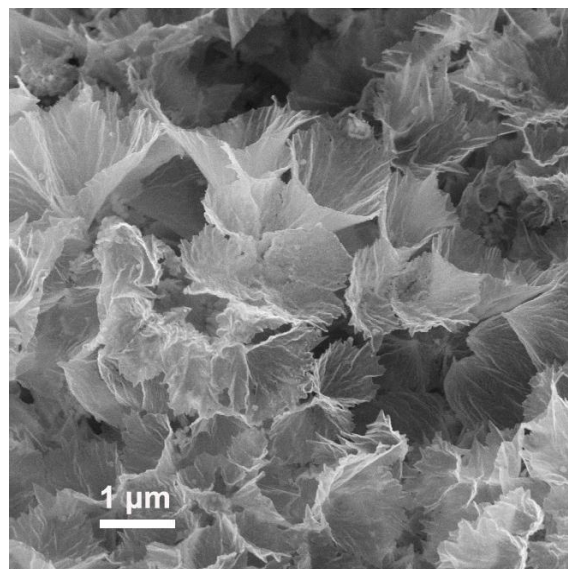

**Figure S7.** AuNHs synthesized after more than one month of their preparation.
